# Supplementary material
Source: MDPI journal article supplement (https://www.mdpi.com/2076-3417/13/8/5075)
Supplement: s1 [file s1]

Article

# The Influence of the Preparation of Tea Infusion on the Content of Fluoride and the Assessment of Health Risk for the Consumer in Poland

Artur Mazurek <sup>1</sup>, Grażyna Kowalska <sup>2,\*</sup>, Marzena Włodarczyk-Stasiak <sup>1,\*</sup>, Jakub Wyrostek <sup>1</sup> and Radosław Kowalski <sup>1</sup>

<sup>1</sup> Department of Analysis and Food Quality Assessment, University of Life Sciences in Lublin, 8 Skromna Str., 20-704 Lublin, Poland

<sup>2</sup> Department of Tourism and Recreation, University of Life Sciences in Lublin, 15 Akademicka Str., 20-950 Lublin, Poland

\* Correspondence: grazyna.kowalska@up.lublin.pl (G.K.); marzena.stasiak@up.lublin.pl (M.W-S.)

**Table S1.** Values of the THQ parameter for various population groups. The average daily tea consumption for age groups above 12 years is 1 L.

|                      | Children |      |      | Girls |      |      | Boys |      |      | Women |      |      | Men  |      |      |      |      |
|----------------------|----------|------|------|-------|------|------|------|------|------|-------|------|------|------|------|------|------|------|
| DI* (L/day)          | 0.44     | 0.56 | 0.61 | 1     | 1    | 1    | 1    | 1    | 1    | 1     | 1    | 1    | 1    | 1    | 1    | 1    | 1    |
| green tea            | 1.16     | 0.93 | 0.72 | 0.83  | 0.62 | 0.57 | 0.83 | 0.59 | 0.47 | 0.70  | 0.58 | 0.49 | 0.42 | 0.58 | 0.49 | 0.42 | 0.37 |
| green tea            | 0.73     | 0.59 | 0.45 | 0.52  | 0.39 | 0.36 | 0.52 | 0.37 | 0.30 | 0.44  | 0.36 | 0.31 | 0.27 | 0.36 | 0.31 | 0.27 | 0.23 |
| green tea            | 1.22     | 0.99 | 0.76 | 0.88  | 0.66 | 0.60 | 0.88 | 0.62 | 0.50 | 0.74  | 0.61 | 0.52 | 0.45 | 0.61 | 0.52 | 0.45 | 0.39 |
| green tea            | 1.93     | 1.56 | 1.20 | 1.40  | 1.04 | 0.95 | 1.40 | 0.98 | 0.79 | 1.18  | 0.96 | 0.82 | 0.71 | 0.96 | 0.82 | 0.71 | 0.62 |
| green tea            | 1.42     | 1.15 | 0.88 | 1.03  | 0.76 | 0.70 | 1.03 | 0.72 | 0.58 | 0.87  | 0.71 | 0.60 | 0.52 | 0.71 | 0.60 | 0.52 | 0.46 |
| green tea            | 2.29     | 1.85 | 1.42 | 1.65  | 1.23 | 1.12 | 1.65 | 1.16 | 0.94 | 1.39  | 1.14 | 0.97 | 0.84 | 1.14 | 0.97 | 0.84 | 0.74 |
| pu-erh               | 0.56     | 0.45 | 0.35 | 0.40  | 0.30 | 0.27 | 0.40 | 0.28 | 0.23 | 0.34  | 0.28 | 0.24 | 0.20 | 0.28 | 0.24 | 0.20 | 0.18 |
| pu-erh               | 0.43     | 0.35 | 0.27 | 0.31  | 0.23 | 0.21 | 0.31 | 0.22 | 0.18 | 0.26  | 0.22 | 0.18 | 0.16 | 0.22 | 0.18 | 0.16 | 0.14 |
| pu-erh               | 0.62     | 0.50 | 0.39 | 0.45  | 0.33 | 0.31 | 0.45 | 0.32 | 0.25 | 0.38  | 0.31 | 0.26 | 0.23 | 0.31 | 0.26 | 0.23 | 0.20 |
| white tea            | 0.78     | 0.63 | 0.49 | 0.57  | 0.42 | 0.38 | 0.57 | 0.40 | 0.32 | 0.48  | 0.39 | 0.33 | 0.29 | 0.39 | 0.33 | 0.29 | 0.25 |
| white tea            | 1.23     | 1.00 | 0.77 | 0.89  | 0.66 | 0.60 | 0.89 | 0.63 | 0.50 | 0.75  | 0.61 | 0.52 | 0.45 | 0.61 | 0.52 | 0.45 | 0.40 |
| white tea            | 0.86     | 0.70 | 0.54 | 0.62  | 0.46 | 0.42 | 0.62 | 0.44 | 0.35 | 0.53  | 0.43 | 0.36 | 0.32 | 0.43 | 0.36 | 0.32 | 0.28 |
| white tea            | 0.94     | 0.76 | 0.59 | 0.68  | 0.51 | 0.46 | 0.68 | 0.48 | 0.39 | 0.57  | 0.47 | 0.40 | 0.34 | 0.47 | 0.40 | 0.34 | 0.30 |
| black leaf tea       | 2.13     | 1.73 | 1.33 | 1.54  | 1.15 | 1.05 | 1.54 | 1.08 | 0.87 | 1.30  | 1.06 | 0.90 | 0.78 | 1.06 | 0.90 | 0.78 | 0.69 |
| black leaf tea       | 1.63     | 1.32 | 1.01 | 1.17  | 0.88 | 0.80 | 1.17 | 0.83 | 0.67 | 0.99  | 0.81 | 0.69 | 0.60 | 0.81 | 0.69 | 0.60 | 0.53 |
| black leaf tea       | 2.95     | 2.39 | 1.84 | 2.13  | 1.59 | 1.45 | 2.13 | 1.50 | 1.21 | 1.80  | 1.47 | 1.25 | 1.08 | 1.47 | 1.25 | 1.08 | 0.95 |
| black leaf tea       | 1.89     | 1.53 | 1.18 | 1.37  | 1.02 | 0.93 | 1.37 | 0.96 | 0.78 | 1.16  | 0.95 | 0.80 | 0.69 | 0.95 | 0.80 | 0.69 | 0.61 |
| black leaf tea       | 1.21     | 0.98 | 0.75 | 0.88  | 0.65 | 0.59 | 0.88 | 0.62 | 0.50 | 0.74  | 0.61 | 0.51 | 0.44 | 0.61 | 0.51 | 0.44 | 0.39 |
| black leaf tea       | 3.75     | 3.03 | 2.33 | 2.71  | 2.02 | 1.84 | 2.71 | 1.91 | 1.54 | 2.29  | 1.87 | 1.58 | 1.37 | 1.87 | 1.58 | 1.37 | 1.21 |
| black granulated tea | 3.40     | 2.75 | 2.12 | 2.45  | 1.83 | 1.66 | 2.45 | 1.73 | 1.39 | 2.07  | 1.70 | 1.43 | 1.24 | 1.70 | 1.43 | 1.24 | 1.10 |
| black granulated tea | 4.36     | 3.53 | 2.71 | 3.15  | 2.35 | 2.14 | 3.15 | 2.22 | 1.79 | 2.66  | 2.18 | 1.84 | 1.60 | 2.18 | 1.84 | 1.60 | 1.41 |
| black granulated tea | 3.79     | 3.06 | 2.36 | 2.73  | 2.04 | 1.85 | 2.73 | 1.92 | 1.55 | 2.31  | 1.89 | 1.60 | 1.38 | 1.89 | 1.60 | 1.38 | 1.22 |
| black tea in bags    | 4.29     | 3.47 | 2.67 | 3.10  | 2.31 | 2.10 | 3.10 | 2.18 | 1.76 | 2.61  | 2.14 | 1.81 | 1.57 | 2.14 | 1.81 | 1.57 | 1.38 |
| black tea in bags    | 3.16     | 2.55 | 1.96 | 2.28  | 1.70 | 1.55 | 2.28 | 1.60 | 1.29 | 1.92  | 1.57 | 1.33 | 1.15 | 1.57 | 1.33 | 1.15 | 1.02 |
| black tea in bags    | 2.52     | 2.04 | 1.57 | 1.82  | 1.36 | 1.24 | 1.82 | 1.28 | 1.03 | 1.54  | 1.26 | 1.07 | 0.92 | 1.26 | 1.07 | 0.92 | 0.81 |
| black tea in bags    | 3.83     | 3.09 | 2.38 | 2.76  | 2.06 | 1.87 | 2.76 | 1.94 | 1.57 | 2.33  | 1.91 | 1.62 | 1.40 | 1.91 | 1.62 | 1.40 | 1.24 |
| black tea in bags    | 4.84     | 3.91 | 3.01 | 3.49  | 2.60 | 2.37 | 3.49 | 2.46 | 1.98 | 2.95  | 2.41 | 2.04 | 1.77 | 2.41 | 2.04 | 1.77 | 1.56 |

\* DI - average daily intake rate of tea.

**Table S2.** THQ parameter determined based on the results of the work of Szmagara et al. [1] obtained under the following brewing conditions: average daily intake rate of tea: DI50%, tea [g]: water [mL] ratio: 1:100; time of brewing: 5 min.

|             | Children |      |      | Girls |      |      | Boys |      |      | Women |      |      |      | Men  |      |      |      |
|-------------|----------|------|------|-------|------|------|------|------|------|-------|------|------|------|------|------|------|------|
| DI* (L/day) | 0.44     | 0.56 | 0.61 | 0.67  | 0.68 | 0.70 | 0.74 | 0.82 | 0.88 | 0.70  | 0.70 | 0.70 | 0.70 | 0.88 | 0.88 | 0.88 | 0.88 |
| black tea   | 1.93     | 1.56 | 1.20 | 0.93  | 0.71 | 0.66 | 1.02 | 0.81 | 0.69 | 0.82  | 0.67 | 0.57 | 0.49 | 0.84 | 0.71 | 0.62 | 0.54 |
| black tea   | 1.34     | 1.09 | 0.84 | 0.65  | 0.49 | 0.46 | 0.71 | 0.56 | 0.48 | 0.57  | 0.47 | 0.40 | 0.34 | 0.59 | 0.50 | 0.43 | 0.38 |
| black tea   | 1.32     | 1.07 | 0.82 | 0.64  | 0.49 | 0.45 | 0.70 | 0.55 | 0.47 | 0.56  | 0.46 | 0.39 | 0.34 | 0.58 | 0.49 | 0.42 | 0.37 |
| black tea   | 2.72     | 2.20 | 1.69 | 1.31  | 1.00 | 0.93 | 1.44 | 1.14 | 0.98 | 1.16  | 0.95 | 0.80 | 0.70 | 1.19 | 1.01 | 0.87 | 0.77 |
| black tea   | 3.66     | 2.96 | 2.28 | 1.76  | 1.34 | 1.26 | 1.94 | 1.53 | 1.31 | 1.56  | 1.28 | 1.08 | 0.94 | 1.60 | 1.35 | 1.17 | 1.03 |
| black tea   | 0.95     | 0.77 | 0.59 | 0.46  | 0.35 | 0.33 | 0.50 | 0.40 | 0.34 | 0.41  | 0.33 | 0.28 | 0.24 | 0.41 | 0.35 | 0.30 | 0.27 |
| black tea   | 1.12     | 0.90 | 0.69 | 0.54  | 0.41 | 0.38 | 0.59 | 0.47 | 0.40 | 0.48  | 0.39 | 0.33 | 0.29 | 0.49 | 0.41 | 0.36 | 0.32 |
| black tea   | 0.97     | 0.78 | 0.60 | 0.47  | 0.36 | 0.33 | 0.51 | 0.40 | 0.35 | 0.41  | 0.34 | 0.29 | 0.25 | 0.42 | 0.36 | 0.31 | 0.27 |
| black tea   | 1.41     | 1.14 | 0.88 | 0.68  | 0.52 | 0.48 | 0.75 | 0.59 | 0.50 | 0.60  | 0.49 | 0.42 | 0.36 | 0.62 | 0.52 | 0.45 | 0.40 |
| black tea   | 0.68     | 0.55 | 0.42 | 0.33  | 0.25 | 0.23 | 0.36 | 0.28 | 0.24 | 0.29  | 0.24 | 0.20 | 0.17 | 0.30 | 0.25 | 0.22 | 0.19 |
| green tea   | 2.97     | 2.40 | 1.85 | 1.43  | 1.09 | 1.02 | 1.58 | 1.24 | 1.07 | 1.27  | 1.04 | 0.88 | 0.76 | 1.30 | 1.10 | 0.95 | 0.84 |
| green tea   | 2.46     | 1.99 | 1.53 | 1.18  | 0.90 | 0.84 | 1.30 | 1.03 | 0.88 | 1.05  | 0.86 | 0.73 | 0.63 | 1.07 | 0.91 | 0.79 | 0.69 |
| green tea   | 1.25     | 1.01 | 0.78 | 0.60  | 0.46 | 0.43 | 0.66 | 0.52 | 0.45 | 0.53  | 0.44 | 0.37 | 0.32 | 0.54 | 0.46 | 0.40 | 0.35 |
| green tea   | 0.51     | 0.41 | 0.31 | 0.24  | 0.19 | 0.17 | 0.27 | 0.21 | 0.18 | 0.22  | 0.18 | 0.15 | 0.13 | 0.22 | 0.19 | 0.16 | 0.14 |
| green tea   | 0.53     | 0.43 | 0.33 | 0.25  | 0.19 | 0.18 | 0.28 | 0.22 | 0.19 | 0.23  | 0.18 | 0.16 | 0.14 | 0.23 | 0.19 | 0.17 | 0.15 |
| white tea   | 1.37     | 1.11 | 0.85 | 0.66  | 0.50 | 0.47 | 0.73 | 0.57 | 0.49 | 0.59  | 0.48 | 0.41 | 0.35 | 0.60 | 0.51 | 0.44 | 0.39 |
| white tea   | 1.43     | 1.16 | 0.89 | 0.69  | 0.53 | 0.49 | 0.76 | 0.60 | 0.51 | 0.61  | 0.50 | 0.42 | 0.37 | 0.63 | 0.53 | 0.46 | 0.40 |
| white tea   | 0.68     | 0.55 | 0.42 | 0.33  | 0.25 | 0.23 | 0.36 | 0.28 | 0.24 | 0.29  | 0.24 | 0.20 | 0.17 | 0.30 | 0.25 | 0.22 | 0.19 |
| earl grey   | 2.47     | 2.00 | 1.54 | 1.19  | 0.91 | 0.85 | 1.31 | 1.03 | 0.89 | 1.06  | 0.86 | 0.73 | 0.63 | 1.08 | 0.91 | 0.79 | 0.70 |
| earl grey   | 1.39     | 1.12 | 0.87 | 0.67  | 0.51 | 0.48 | 0.74 | 0.58 | 0.50 | 0.59  | 0.49 | 0.41 | 0.36 | 0.61 | 0.51 | 0.45 | 0.39 |
| earl grey   | 0.44     | 0.35 | 0.27 | 0.21  | 0.16 | 0.15 | 0.23 | 0.18 | 0.16 | 0.19  | 0.15 | 0.13 | 0.11 | 0.19 | 0.16 | 0.14 | 0.12 |
| pu-erh      | 1.60     | 1.29 | 1.00 | 0.77  | 0.59 | 0.55 | 0.85 | 0.67 | 0.57 | 0.68  | 0.56 | 0.47 | 0.41 | 0.70 | 0.59 | 0.51 | 0.45 |
| pu-erh      | 1.32     | 1.07 | 0.82 | 0.63  | 0.48 | 0.45 | 0.70 | 0.55 | 0.47 | 0.56  | 0.46 | 0.39 | 0.34 | 0.58 | 0.49 | 0.42 | 0.37 |
| pu-erh      | 0.72     | 0.58 | 0.45 | 0.35  | 0.26 | 0.25 | 0.38 | 0.30 | 0.26 | 0.31  | 0.25 | 0.21 | 0.18 | 0.31 | 0.27 | 0.23 | 0.20 |

\* DI - average daily intake rate of tea.

**Table S3.** THQ parameter determined based on the results of the work of Szmagara et al. [1] obtained under the following brewing conditions: average daily intake rate of tea: DI50%, tea [g]: water [mL] ratio: 1:100; time of brewing: 15 min.

|             | Children |      |      | Girls |      |      | Boys |      |      | Women |      |      |      | Men  |      |      |      |
|-------------|----------|------|------|-------|------|------|------|------|------|-------|------|------|------|------|------|------|------|
| DI* (L/day) | 0.44     | 0.56 | 0.61 | 0.67  | 0.68 | 0.70 | 0.74 | 0.82 | 0.88 | 0.70  | 0.70 | 0.70 | 0.70 | 0.88 | 0.88 | 0.88 | 0.88 |
| black tea   | 2.48     | 2.01 | 1.54 | 1.19  | 0.91 | 0.85 | 1.32 | 1.04 | 0.89 | 1.06  | 0.87 | 0.73 | 0.64 | 1.08 | 0.92 | 0.79 | 0.70 |
| black tea   | 1.54     | 1.25 | 0.96 | 0.74  | 0.57 | 0.53 | 0.82 | 0.64 | 0.55 | 0.66  | 0.54 | 0.46 | 0.40 | 0.67 | 0.57 | 0.49 | 0.44 |
| black tea   | 1.48     | 1.20 | 0.92 | 0.71  | 0.54 | 0.51 | 0.79 | 0.62 | 0.53 | 0.63  | 0.52 | 0.44 | 0.38 | 0.65 | 0.55 | 0.47 | 0.42 |
| black tea   | 3.71     | 3.00 | 2.31 | 1.78  | 1.36 | 1.27 | 1.97 | 1.55 | 1.33 | 1.58  | 1.29 | 1.09 | 0.95 | 1.62 | 1.37 | 1.19 | 1.05 |
| black tea   | 4.11     | 3.32 | 2.56 | 1.97  | 1.51 | 1.41 | 2.18 | 1.72 | 1.47 | 1.75  | 1.43 | 1.21 | 1.05 | 1.79 | 1.52 | 1.31 | 1.16 |
| black tea   | 1.28     | 1.04 | 0.80 | 0.61  | 0.47 | 0.44 | 0.68 | 0.54 | 0.46 | 0.55  | 0.45 | 0.38 | 0.33 | 0.56 | 0.47 | 0.41 | 0.36 |
| black tea   | 1.27     | 1.03 | 0.79 | 0.61  | 0.47 | 0.44 | 0.67 | 0.53 | 0.45 | 0.54  | 0.44 | 0.37 | 0.32 | 0.55 | 0.47 | 0.41 | 0.36 |
| black tea   | 1.15     | 0.93 | 0.71 | 0.55  | 0.42 | 0.39 | 0.61 | 0.48 | 0.41 | 0.49  | 0.40 | 0.34 | 0.29 | 0.50 | 0.42 | 0.37 | 0.32 |
| black tea   | 1.79     | 1.45 | 1.11 | 0.86  | 0.66 | 0.61 | 0.95 | 0.75 | 0.64 | 0.76  | 0.63 | 0.53 | 0.46 | 0.78 | 0.66 | 0.57 | 0.51 |
| black tea   | 0.84     | 0.68 | 0.52 | 0.40  | 0.31 | 0.29 | 0.44 | 0.35 | 0.30 | 0.36  | 0.29 | 0.25 | 0.21 | 0.36 | 0.31 | 0.27 | 0.24 |
| green tea   | 2.98     | 2.41 | 1.86 | 1.43  | 1.09 | 1.02 | 1.58 | 1.25 | 1.07 | 1.27  | 1.04 | 0.88 | 0.76 | 1.30 | 1.10 | 0.95 | 0.84 |
| green tea   | 2.73     | 2.21 | 1.70 | 1.31  | 1.00 | 0.94 | 1.45 | 1.14 | 0.98 | 1.17  | 0.95 | 0.81 | 0.70 | 1.19 | 1.01 | 0.87 | 0.77 |
| green tea   | 1.45     | 1.17 | 0.90 | 0.70  | 0.53 | 0.50 | 0.77 | 0.61 | 0.52 | 0.62  | 0.51 | 0.43 | 0.37 | 0.63 | 0.53 | 0.46 | 0.41 |
| green tea   | 0.61     | 0.49 | 0.38 | 0.29  | 0.22 | 0.21 | 0.32 | 0.25 | 0.22 | 0.26  | 0.21 | 0.18 | 0.16 | 0.26 | 0.22 | 0.19 | 0.17 |
| green tea   | 0.57     | 0.46 | 0.36 | 0.28  | 0.21 | 0.20 | 0.30 | 0.24 | 0.21 | 0.24  | 0.20 | 0.17 | 0.15 | 0.25 | 0.21 | 0.18 | 0.16 |
| white tea   | 1.50     | 1.22 | 0.94 | 0.72  | 0.55 | 0.52 | 0.80 | 0.63 | 0.54 | 0.64  | 0.53 | 0.44 | 0.39 | 0.66 | 0.56 | 0.48 | 0.42 |
| white tea   | 1.51     | 1.22 | 0.94 | 0.73  | 0.56 | 0.52 | 0.80 | 0.63 | 0.54 | 0.65  | 0.53 | 0.45 | 0.39 | 0.66 | 0.56 | 0.48 | 0.43 |
| white tea   | 0.72     | 0.58 | 0.45 | 0.35  | 0.26 | 0.25 | 0.38 | 0.30 | 0.26 | 0.31  | 0.25 | 0.21 | 0.18 | 0.31 | 0.27 | 0.23 | 0.20 |
| earl grey   | 2.87     | 2.32 | 1.79 | 1.38  | 1.05 | 0.98 | 1.52 | 1.20 | 1.03 | 1.22  | 1.00 | 0.85 | 0.73 | 1.25 | 1.06 | 0.92 | 0.81 |
| earl grey   | 1.78     | 1.44 | 1.11 | 0.85  | 0.65 | 0.61 | 0.94 | 0.74 | 0.64 | 0.76  | 0.62 | 0.53 | 0.46 | 0.78 | 0.66 | 0.57 | 0.50 |
| earl grey   | 0.50     | 0.40 | 0.31 | 0.24  | 0.18 | 0.17 | 0.26 | 0.21 | 0.18 | 0.21  | 0.17 | 0.15 | 0.13 | 0.22 | 0.18 | 0.16 | 0.14 |
| pu-erh      | 1.62     | 1.31 | 1.01 | 0.78  | 0.60 | 0.56 | 0.86 | 0.68 | 0.58 | 0.69  | 0.57 | 0.48 | 0.42 | 0.71 | 0.60 | 0.52 | 0.46 |
| pu-erh      | 1.43     | 1.15 | 0.89 | 0.69  | 0.52 | 0.49 | 0.76 | 0.60 | 0.51 | 0.61  | 0.50 | 0.42 | 0.37 | 0.62 | 0.53 | 0.46 | 0.40 |
| pu-erh      | 0.83     | 0.67 | 0.52 | 0.40  | 0.30 | 0.28 | 0.44 | 0.35 | 0.30 | 0.35  | 0.29 | 0.24 | 0.21 | 0.36 | 0.31 | 0.27 | 0.23 |

\* DI - average daily intake rate of tea.

**Table S4.** THQ parameter determined based on the results of the work of Szmagara et al. [1] obtained under the following brewing conditions: average daily intake rate of tea for age groups above 12 years is 1 L, tea [g]: water [mL] ratio: 1:100; time of brewing: 5 min.

|             | Children |      |      | Girls |      |      | Boys |      |      | Women |      |      | Men  |      |      |
|-------------|----------|------|------|-------|------|------|------|------|------|-------|------|------|------|------|------|
| DI* (L/day) | 0.44     | 0.56 | 0.61 | 1     | 1    | 1    | 1    | 1    | 1    | 1     | 1    | 1    | 1    | 1    | 1    |
| black tea   | 1.93     | 1.56 | 1.20 | 1.39  | 1.04 | 0.94 | 1.39 | 0.98 | 0.79 | 1.17  | 0.96 | 0.81 | 0.70 | 0.96 | 0.81 |
| black tea   | 1.34     | 1.09 | 0.84 | 0.97  | 0.72 | 0.66 | 0.97 | 0.68 | 0.55 | 0.82  | 0.67 | 0.57 | 0.49 | 0.67 | 0.57 |
| black tea   | 1.32     | 1.07 | 0.82 | 0.96  | 0.71 | 0.65 | 0.96 | 0.67 | 0.54 | 0.81  | 0.66 | 0.56 | 0.48 | 0.66 | 0.56 |
| black tea   | 2.72     | 2.20 | 1.69 | 1.96  | 1.46 | 1.33 | 1.96 | 1.38 | 1.11 | 1.66  | 1.36 | 1.15 | 1.00 | 1.36 | 1.15 |
| black tea   | 3.66     | 2.96 | 2.28 | 2.64  | 1.97 | 1.79 | 2.64 | 1.86 | 1.50 | 2.23  | 1.83 | 1.55 | 1.34 | 1.83 | 1.55 |
| black tea   | 0.95     | 0.77 | 0.59 | 0.69  | 0.51 | 0.47 | 0.69 | 0.48 | 0.39 | 0.58  | 0.47 | 0.40 | 0.35 | 0.47 | 0.40 |
| black tea   | 1.12     | 0.90 | 0.69 | 0.81  | 0.60 | 0.55 | 0.81 | 0.57 | 0.46 | 0.68  | 0.56 | 0.47 | 0.41 | 0.56 | 0.47 |
| black tea   | 0.97     | 0.78 | 0.60 | 0.70  | 0.52 | 0.47 | 0.70 | 0.49 | 0.40 | 0.59  | 0.48 | 0.41 | 0.35 | 0.48 | 0.41 |
| black tea   | 1.41     | 1.14 | 0.88 | 1.02  | 0.76 | 0.69 | 1.02 | 0.72 | 0.58 | 0.86  | 0.70 | 0.59 | 0.52 | 0.70 | 0.59 |
| black tea   | 0.68     | 0.55 | 0.42 | 0.49  | 0.37 | 0.33 | 0.49 | 0.35 | 0.28 | 0.42  | 0.34 | 0.29 | 0.25 | 0.34 | 0.29 |
| green tea   | 2.97     | 2.40 | 1.85 | 2.15  | 1.60 | 1.46 | 2.15 | 1.51 | 1.22 | 1.81  | 1.48 | 1.25 | 1.09 | 1.48 | 1.25 |
| green tea   | 2.46     | 1.99 | 1.53 | 1.77  | 1.32 | 1.20 | 1.77 | 1.25 | 1.01 | 1.50  | 1.22 | 1.04 | 0.90 | 1.22 | 1.04 |
| green tea   | 1.25     | 1.01 | 0.78 | 0.90  | 0.67 | 0.61 | 0.90 | 0.63 | 0.51 | 0.76  | 0.62 | 0.53 | 0.46 | 0.62 | 0.53 |
| green tea   | 0.51     | 0.41 | 0.31 | 0.36  | 0.27 | 0.25 | 0.36 | 0.26 | 0.21 | 0.31  | 0.25 | 0.21 | 0.18 | 0.25 | 0.21 |
| green tea   | 0.53     | 0.43 | 0.33 | 0.38  | 0.28 | 0.26 | 0.38 | 0.27 | 0.22 | 0.32  | 0.26 | 0.22 | 0.19 | 0.26 | 0.22 |
| white tea   | 1.37     | 1.11 | 0.85 | 0.99  | 0.74 | 0.67 | 0.99 | 0.70 | 0.56 | 0.84  | 0.68 | 0.58 | 0.50 | 0.68 | 0.58 |
| white tea   | 1.43     | 1.16 | 0.89 | 1.03  | 0.77 | 0.70 | 1.03 | 0.73 | 0.59 | 0.87  | 0.71 | 0.60 | 0.52 | 0.71 | 0.60 |
| white tea   | 0.68     | 0.55 | 0.42 | 0.49  | 0.37 | 0.33 | 0.49 | 0.35 | 0.28 | 0.42  | 0.34 | 0.29 | 0.25 | 0.34 | 0.29 |
| earl grey   | 2.47     | 2.00 | 1.54 | 1.79  | 1.33 | 1.21 | 1.79 | 1.26 | 1.01 | 1.51  | 1.23 | 1.04 | 0.90 | 1.23 | 1.04 |
| earl grey   | 1.39     | 1.12 | 0.87 | 1.00  | 0.75 | 0.68 | 1.00 | 0.71 | 0.57 | 0.85  | 0.69 | 0.59 | 0.51 | 0.69 | 0.59 |
| earl grey   | 0.44     | 0.35 | 0.27 | 0.31  | 0.23 | 0.21 | 0.31 | 0.22 | 0.18 | 0.27  | 0.22 | 0.18 | 0.16 | 0.22 | 0.18 |
| pu-erh      | 1.60     | 1.29 | 1.00 | 1.16  | 0.86 | 0.78 | 1.16 | 0.81 | 0.66 | 0.98  | 0.80 | 0.68 | 0.59 | 0.80 | 0.68 |
| pu-erh      | 1.32     | 1.07 | 0.82 | 0.95  | 0.71 | 0.65 | 0.95 | 0.67 | 0.54 | 0.80  | 0.66 | 0.56 | 0.48 | 0.66 | 0.56 |
| pu-erh      | 0.72     | 0.58 | 0.45 | 0.52  | 0.39 | 0.35 | 0.52 | 0.37 | 0.30 | 0.44  | 0.36 | 0.30 | 0.26 | 0.36 | 0.30 |

\* DI - average daily intake rate of tea.

**Table S5.** THQ parameter determined based on the results of the work of Szmagara et al. [1] obtained under the following brewing conditions: average daily intake rate of tea for age groups above 12 years is 1 L, tea [g]: water [mL] ratio: 1:100; time of brewing: 15 min.

|             | Children |      |      | Girls |      |      | Boys |      |      | Women |      |      | Men  |      |      |
|-------------|----------|------|------|-------|------|------|------|------|------|-------|------|------|------|------|------|
| DI* (L/day) | 0.44     | 0.56 | 0.61 | 1     | 1    | 1    | 1    | 1    | 1    | 1     | 1    | 1    | 1    | 1    | 1    |
| black tea   | 2.48     | 2.01 | 1.54 | 1.79  | 1.33 | 1.22 | 1.79 | 1.26 | 1.02 | 1.51  | 1.24 | 1.05 | 0.91 | 1.24 | 1.05 |
| black tea   | 1.54     | 1.25 | 0.96 | 1.11  | 0.83 | 0.76 | 1.11 | 0.78 | 0.63 | 0.94  | 0.77 | 0.65 | 0.56 | 0.77 | 0.65 |
| black tea   | 1.48     | 1.20 | 0.92 | 1.07  | 0.80 | 0.73 | 1.07 | 0.75 | 0.61 | 0.90  | 0.74 | 0.63 | 0.54 | 0.74 | 0.63 |
| black tea   | 3.71     | 3.00 | 2.31 | 2.67  | 1.99 | 1.81 | 2.67 | 1.88 | 1.52 | 2.26  | 1.85 | 1.56 | 1.36 | 1.85 | 1.56 |
| black tea   | 4.11     | 3.32 | 2.56 | 2.96  | 2.21 | 2.01 | 2.96 | 2.09 | 1.68 | 2.50  | 2.05 | 1.73 | 1.50 | 2.05 | 1.73 |
| black tea   | 1.28     | 1.04 | 0.80 | 0.92  | 0.69 | 0.63 | 0.92 | 0.65 | 0.52 | 0.78  | 0.64 | 0.54 | 0.47 | 0.64 | 0.54 |
| black tea   | 1.27     | 1.03 | 0.79 | 0.92  | 0.68 | 0.62 | 0.92 | 0.64 | 0.52 | 0.77  | 0.63 | 0.54 | 0.46 | 0.63 | 0.54 |
| black tea   | 1.15     | 0.93 | 0.71 | 0.83  | 0.62 | 0.56 | 0.83 | 0.58 | 0.47 | 0.70  | 0.57 | 0.48 | 0.42 | 0.57 | 0.48 |
| black tea   | 1.79     | 1.45 | 1.11 | 1.29  | 0.96 | 0.88 | 1.29 | 0.91 | 0.73 | 1.09  | 0.89 | 0.76 | 0.66 | 0.89 | 0.76 |
| black tea   | 0.84     | 0.68 | 0.52 | 0.60  | 0.45 | 0.41 | 0.60 | 0.42 | 0.34 | 0.51  | 0.42 | 0.35 | 0.31 | 0.42 | 0.35 |
| green tea   | 2.98     | 2.41 | 1.86 | 2.15  | 1.60 | 1.46 | 2.15 | 1.51 | 1.22 | 1.82  | 1.49 | 1.26 | 1.09 | 1.49 | 1.26 |
| green tea   | 2.73     | 2.21 | 1.70 | 1.97  | 1.47 | 1.34 | 1.97 | 1.39 | 1.12 | 1.66  | 1.36 | 1.15 | 1.00 | 1.36 | 1.15 |
| green tea   | 1.45     | 1.17 | 0.90 | 1.05  | 0.78 | 0.71 | 1.05 | 0.74 | 0.59 | 0.88  | 0.72 | 0.61 | 0.53 | 0.72 | 0.61 |
| green tea   | 0.61     | 0.49 | 0.38 | 0.44  | 0.33 | 0.30 | 0.44 | 0.31 | 0.25 | 0.37  | 0.30 | 0.26 | 0.22 | 0.30 | 0.26 |
| green tea   | 0.57     | 0.46 | 0.36 | 0.41  | 0.31 | 0.28 | 0.41 | 0.29 | 0.23 | 0.35  | 0.29 | 0.24 | 0.21 | 0.29 | 0.24 |
| white tea   | 1.50     | 1.22 | 0.94 | 1.09  | 0.81 | 0.74 | 1.09 | 0.76 | 0.62 | 0.92  | 0.75 | 0.63 | 0.55 | 0.75 | 0.63 |
| white tea   | 1.51     | 1.22 | 0.94 | 1.09  | 0.81 | 0.74 | 1.09 | 0.77 | 0.62 | 0.92  | 0.76 | 0.64 | 0.55 | 0.76 | 0.64 |
| white tea   | 0.72     | 0.58 | 0.45 | 0.52  | 0.39 | 0.35 | 0.52 | 0.37 | 0.30 | 0.44  | 0.36 | 0.30 | 0.26 | 0.36 | 0.30 |
| earl grey   | 2.87     | 2.32 | 1.79 | 2.07  | 1.54 | 1.41 | 2.07 | 1.46 | 1.17 | 1.75  | 1.43 | 1.21 | 1.05 | 1.43 | 1.21 |
| earl grey   | 1.78     | 1.44 | 1.11 | 1.29  | 0.96 | 0.87 | 1.29 | 0.90 | 0.73 | 1.09  | 0.89 | 0.75 | 0.65 | 0.89 | 0.75 |
| earl grey   | 0.50     | 0.40 | 0.31 | 0.36  | 0.27 | 0.24 | 0.36 | 0.25 | 0.20 | 0.30  | 0.25 | 0.21 | 0.18 | 0.25 | 0.21 |
| pu-erh      | 1.62     | 1.31 | 1.01 | 1.17  | 0.87 | 0.80 | 1.17 | 0.83 | 0.66 | 0.99  | 0.81 | 0.69 | 0.59 | 0.81 | 0.69 |
| pu-erh      | 1.43     | 1.15 | 0.89 | 1.03  | 0.77 | 0.70 | 1.03 | 0.73 | 0.58 | 0.87  | 0.71 | 0.60 | 0.52 | 0.71 | 0.60 |
| pu-erh      | 0.83     | 0.67 | 0.52 | 0.60  | 0.45 | 0.41 | 0.60 | 0.42 | 0.34 | 0.51  | 0.41 | 0.35 | 0.30 | 0.41 | 0.35 |

\* DI - average daily intake rate of tea.

**Table S6.** THQ parameter determined based on the results of the work of Szmagara et al. [1] obtained under the following brewing conditions: average daily intake rate of tea: DI50%, tea [g]: water [mL] ratio: 2:100; time of brewing: 5 min.

|             | Children |      |      | Girls |      |      | Boys |      |      | Women |      |      |      | Men  |      |      |      |
|-------------|----------|------|------|-------|------|------|------|------|------|-------|------|------|------|------|------|------|------|
| DI* (L/day) | 0.44     | 0.56 | 0.61 | 0.67  | 0.68 | 0.70 | 0.74 | 0.82 | 0.88 | 0.70  | 0.70 | 0.70 | 0.70 | 0.88 | 0.88 | 0.88 | 0.88 |
| black tea   | 3.85     | 3.12 | 2.40 | 1.85  | 1.41 | 1.32 | 2.05 | 1.61 | 1.38 | 1.64  | 1.35 | 1.14 | 0.99 | 1.68 | 1.42 | 1.23 | 1.09 |
| black tea   | 2.69     | 2.17 | 1.67 | 1.29  | 0.99 | 0.92 | 1.43 | 1.12 | 0.96 | 1.15  | 0.94 | 0.79 | 0.69 | 1.17 | 0.99 | 0.86 | 0.76 |
| black tea   | 2.65     | 2.14 | 1.65 | 1.27  | 0.97 | 0.91 | 1.40 | 1.11 | 0.95 | 1.13  | 0.92 | 0.78 | 0.68 | 1.16 | 0.98 | 0.85 | 0.75 |
| black tea   | 5.44     | 4.40 | 3.39 | 2.61  | 2.00 | 1.87 | 2.89 | 2.27 | 1.95 | 2.32  | 1.90 | 1.61 | 1.39 | 2.38 | 2.01 | 1.74 | 1.54 |
| black tea   | 7.33     | 5.92 | 4.56 | 3.52  | 2.69 | 2.51 | 3.89 | 3.06 | 2.62 | 3.13  | 2.56 | 2.16 | 1.88 | 3.20 | 2.71 | 2.34 | 2.07 |
| black tea   | 1.90     | 1.54 | 1.18 | 0.91  | 0.70 | 0.65 | 1.01 | 0.79 | 0.68 | 0.81  | 0.66 | 0.56 | 0.49 | 0.83 | 0.70 | 0.61 | 0.54 |
| black tea   | 2.23     | 1.80 | 1.39 | 1.07  | 0.82 | 0.77 | 1.18 | 0.93 | 0.80 | 0.95  | 0.78 | 0.66 | 0.57 | 0.97 | 0.82 | 0.71 | 0.63 |
| black tea   | 1.94     | 1.57 | 1.21 | 0.93  | 0.71 | 0.66 | 1.03 | 0.81 | 0.69 | 0.83  | 0.68 | 0.57 | 0.50 | 0.85 | 0.72 | 0.62 | 0.55 |
| black tea   | 2.82     | 2.28 | 1.75 | 1.35  | 1.03 | 0.97 | 1.50 | 1.18 | 1.01 | 1.20  | 0.98 | 0.83 | 0.72 | 1.23 | 1.04 | 0.90 | 0.80 |
| black tea   | 1.36     | 1.10 | 0.85 | 0.65  | 0.50 | 0.47 | 0.72 | 0.57 | 0.49 | 0.58  | 0.48 | 0.40 | 0.35 | 0.60 | 0.50 | 0.44 | 0.39 |
| green tea   | 5.95     | 4.81 | 3.70 | 2.85  | 2.18 | 2.04 | 3.15 | 2.48 | 2.13 | 2.54  | 2.08 | 1.76 | 1.52 | 2.59 | 2.20 | 1.90 | 1.68 |
| green tea   | 4.91     | 3.97 | 3.06 | 2.36  | 1.80 | 1.68 | 2.61 | 2.05 | 1.76 | 2.10  | 1.71 | 1.45 | 1.26 | 2.14 | 1.81 | 1.57 | 1.39 |
| green tea   | 2.49     | 2.02 | 1.55 | 1.20  | 0.91 | 0.85 | 1.32 | 1.04 | 0.89 | 1.06  | 0.87 | 0.74 | 0.64 | 1.09 | 0.92 | 0.80 | 0.70 |
| green tea   | 1.01     | 0.82 | 0.63 | 0.49  | 0.37 | 0.35 | 0.54 | 0.42 | 0.36 | 0.43  | 0.35 | 0.30 | 0.26 | 0.44 | 0.37 | 0.32 | 0.29 |
| green tea   | 1.06     | 0.85 | 0.66 | 0.51  | 0.39 | 0.36 | 0.56 | 0.44 | 0.38 | 0.45  | 0.37 | 0.31 | 0.27 | 0.46 | 0.39 | 0.34 | 0.30 |
| white tea   | 2.74     | 2.22 | 1.71 | 1.32  | 1.01 | 0.94 | 1.46 | 1.15 | 0.98 | 1.17  | 0.96 | 0.81 | 0.70 | 1.20 | 1.01 | 0.88 | 0.77 |
| white tea   | 2.87     | 2.32 | 1.78 | 1.38  | 1.05 | 0.98 | 1.52 | 1.20 | 1.03 | 1.22  | 1.00 | 0.85 | 0.73 | 1.25 | 1.06 | 0.92 | 0.81 |
| white tea   | 1.36     | 1.10 | 0.85 | 0.65  | 0.50 | 0.47 | 0.72 | 0.57 | 0.49 | 0.58  | 0.48 | 0.40 | 0.35 | 0.60 | 0.50 | 0.44 | 0.39 |
| earl grey   | 4.95     | 4.00 | 3.08 | 2.37  | 1.82 | 1.70 | 2.62 | 2.07 | 1.77 | 2.11  | 1.73 | 1.46 | 1.27 | 2.16 | 1.83 | 1.58 | 1.40 |
| earl grey   | 2.78     | 2.25 | 1.73 | 1.34  | 1.02 | 0.95 | 1.48 | 1.16 | 1.00 | 1.19  | 0.97 | 0.82 | 0.71 | 1.21 | 1.03 | 0.89 | 0.79 |
| earl grey   | 0.87     | 0.71 | 0.54 | 0.42  | 0.32 | 0.30 | 0.46 | 0.36 | 0.31 | 0.37  | 0.30 | 0.26 | 0.22 | 0.38 | 0.32 | 0.28 | 0.25 |
| pu-erh      | 3.20     | 2.59 | 1.99 | 1.54  | 1.17 | 1.10 | 1.70 | 1.34 | 1.15 | 1.37  | 1.12 | 0.95 | 0.82 | 1.40 | 1.18 | 1.02 | 0.90 |
| pu-erh      | 2.64     | 2.13 | 1.64 | 1.27  | 0.97 | 0.90 | 1.40 | 1.10 | 0.94 | 1.12  | 0.92 | 0.78 | 0.67 | 1.15 | 0.97 | 0.84 | 0.74 |
| pu-erh      | 1.44     | 1.17 | 0.90 | 0.69  | 0.53 | 0.49 | 0.76 | 0.60 | 0.52 | 0.61  | 0.50 | 0.43 | 0.37 | 0.63 | 0.53 | 0.46 | 0.41 |

\* DI - average daily intake rate of tea.

**Table S7.** THQ parameter determined based on the results of the work of Szmagara et al. [1] obtained under the following brewing conditions: average daily intake rate of tea: DI50%, tea [g]: water [mL] ratio: 2:100; time of brewing: 15 min.

|             | Children |      |      | Girls |      |      | Boys |      |      | Women |      |      |      | Men  |      |      |      |
|-------------|----------|------|------|-------|------|------|------|------|------|-------|------|------|------|------|------|------|------|
| DI* (L/day) | 0.44     | 0.56 | 0.61 | 0.67  | 0.68 | 0.70 | 0.74 | 0.82 | 0.88 | 0.70  | 0.70 | 0.70 | 0.70 | 0.88 | 0.88 | 0.88 | 0.88 |
| black tea   | 4.96     | 4.01 | 3.09 | 2.38  | 1.82 | 1.70 | 2.63 | 2.07 | 1.78 | 2.12  | 1.73 | 1.47 | 1.27 | 2.17 | 1.83 | 1.59 | 1.40 |
| black tea   | 3.09     | 2.50 | 1.92 | 1.48  | 1.13 | 1.06 | 1.64 | 1.29 | 1.11 | 1.32  | 1.08 | 0.91 | 0.79 | 1.35 | 1.14 | 0.99 | 0.87 |
| black tea   | 2.97     | 2.40 | 1.85 | 1.42  | 1.09 | 1.02 | 1.57 | 1.24 | 1.06 | 1.27  | 1.04 | 0.88 | 0.76 | 1.30 | 1.10 | 0.95 | 0.84 |
| black tea   | 7.41     | 5.99 | 4.61 | 3.56  | 2.72 | 2.54 | 3.93 | 3.10 | 2.65 | 3.16  | 2.59 | 2.19 | 1.90 | 3.23 | 2.74 | 2.37 | 2.09 |
| black tea   | 8.21     | 6.64 | 5.11 | 3.94  | 3.02 | 2.82 | 4.36 | 3.43 | 2.94 | 3.50  | 2.87 | 2.43 | 2.10 | 3.58 | 3.03 | 2.63 | 2.32 |
| black tea   | 2.56     | 2.07 | 1.59 | 1.23  | 0.94 | 0.88 | 1.36 | 1.07 | 0.92 | 1.09  | 0.89 | 0.76 | 0.66 | 1.12 | 0.95 | 0.82 | 0.72 |
| black tea   | 2.54     | 2.05 | 1.58 | 1.22  | 0.93 | 0.87 | 1.35 | 1.06 | 0.91 | 1.08  | 0.89 | 0.75 | 0.65 | 1.11 | 0.94 | 0.81 | 0.72 |
| black tea   | 2.30     | 1.86 | 1.43 | 1.10  | 0.84 | 0.79 | 1.22 | 0.96 | 0.82 | 0.98  | 0.80 | 0.68 | 0.59 | 1.00 | 0.85 | 0.74 | 0.65 |
| black tea   | 3.58     | 2.90 | 2.23 | 1.72  | 1.32 | 1.23 | 1.90 | 1.50 | 1.28 | 1.53  | 1.25 | 1.06 | 0.92 | 1.56 | 1.32 | 1.15 | 1.01 |
| black tea   | 1.67     | 1.35 | 1.04 | 0.80  | 0.61 | 0.57 | 0.89 | 0.70 | 0.60 | 0.71  | 0.58 | 0.49 | 0.43 | 0.73 | 0.62 | 0.54 | 0.47 |
| green tea   | 5.96     | 4.82 | 3.71 | 2.86  | 2.19 | 2.05 | 3.16 | 2.49 | 2.14 | 2.54  | 2.08 | 1.76 | 1.53 | 2.60 | 2.20 | 1.91 | 1.68 |
| green tea   | 5.46     | 4.42 | 3.40 | 2.62  | 2.00 | 1.87 | 2.90 | 2.28 | 1.96 | 2.33  | 1.91 | 1.61 | 1.40 | 2.38 | 2.02 | 1.75 | 1.54 |
| green tea   | 2.90     | 2.34 | 1.80 | 1.39  | 1.06 | 0.99 | 1.54 | 1.21 | 1.04 | 1.24  | 1.01 | 0.86 | 0.74 | 1.26 | 1.07 | 0.93 | 0.82 |
| green tea   | 1.21     | 0.98 | 0.75 | 0.58  | 0.44 | 0.42 | 0.64 | 0.51 | 0.43 | 0.52  | 0.42 | 0.36 | 0.31 | 0.53 | 0.45 | 0.39 | 0.34 |
| green tea   | 1.15     | 0.93 | 0.71 | 0.55  | 0.42 | 0.39 | 0.61 | 0.48 | 0.41 | 0.49  | 0.40 | 0.34 | 0.29 | 0.50 | 0.42 | 0.37 | 0.32 |
| white tea   | 3.01     | 2.43 | 1.87 | 1.44  | 1.10 | 1.03 | 1.60 | 1.26 | 1.08 | 1.28  | 1.05 | 0.89 | 0.77 | 1.31 | 1.11 | 0.96 | 0.85 |
| white tea   | 3.03     | 2.45 | 1.88 | 1.45  | 1.11 | 1.04 | 1.61 | 1.27 | 1.08 | 1.29  | 1.06 | 0.89 | 0.78 | 1.32 | 1.12 | 0.97 | 0.86 |
| white tea   | 1.44     | 1.17 | 0.90 | 0.69  | 0.53 | 0.49 | 0.76 | 0.60 | 0.52 | 0.61  | 0.50 | 0.43 | 0.37 | 0.63 | 0.53 | 0.46 | 0.41 |
| earl grey   | 5.74     | 4.64 | 3.57 | 2.75  | 2.11 | 1.97 | 3.04 | 2.40 | 2.06 | 2.45  | 2.00 | 1.70 | 1.47 | 2.50 | 2.12 | 1.84 | 1.62 |
| earl grey   | 3.56     | 2.88 | 2.22 | 1.71  | 1.31 | 1.22 | 1.89 | 1.49 | 1.28 | 1.52  | 1.24 | 1.05 | 0.91 | 1.55 | 1.31 | 1.14 | 1.01 |
| earl grey   | 0.99     | 0.80 | 0.62 | 0.48  | 0.36 | 0.34 | 0.53 | 0.41 | 0.36 | 0.42  | 0.35 | 0.29 | 0.25 | 0.43 | 0.37 | 0.32 | 0.28 |
| pu-erh      | 3.25     | 2.63 | 2.02 | 1.56  | 1.19 | 1.11 | 1.72 | 1.36 | 1.16 | 1.39  | 1.13 | 0.96 | 0.83 | 1.42 | 1.20 | 1.04 | 0.92 |
| pu-erh      | 2.86     | 2.31 | 1.78 | 1.37  | 1.05 | 0.98 | 1.52 | 1.19 | 1.02 | 1.22  | 1.00 | 0.84 | 0.73 | 1.25 | 1.05 | 0.91 | 0.81 |
| pu-erh      | 1.66     | 1.34 | 1.03 | 0.80  | 0.61 | 0.57 | 0.88 | 0.69 | 0.59 | 0.71  | 0.58 | 0.49 | 0.42 | 0.72 | 0.61 | 0.53 | 0.47 |

\* DI - average daily intake rate of tea.



**Table S8.** THQ parameter determined based on the results of the work of Szmagara et al. [1] obtained under the following brewing conditions: average daily intake rate of tea for age groups above 12 years is 1 L, tea [g]: water [mL] ratio: 2:100; time of brewing: 5 min.

|             | Children |      |      | Girls |      |      | Boys |      |      | Women |      |      | Men  |      |      |      |      |
|-------------|----------|------|------|-------|------|------|------|------|------|-------|------|------|------|------|------|------|------|
| DI* (L/day) | 0.44     | 0.56 | 0.61 | 1     | 1    | 1    | 1    | 1    | 1    | 1     | 1    | 1    | 1    | 1    | 1    | 1    |      |
| black tea   | 3.85     | 3.12 | 2.40 | 2.78  | 2.07 | 1.89 | 2.78 | 1.96 | 1.58 | 2.35  | 1.92 | 1.63 | 1.41 | 1.92 | 1.63 | 1.41 | 1.24 |
| black tea   | 2.69     | 2.17 | 1.67 | 1.94  | 1.45 | 1.32 | 1.94 | 1.37 | 1.10 | 1.64  | 1.34 | 1.13 | 0.98 | 1.34 | 1.13 | 0.98 | 0.87 |
| black tea   | 2.65     | 2.14 | 1.65 | 1.91  | 1.42 | 1.30 | 1.91 | 1.34 | 1.08 | 1.61  | 1.32 | 1.12 | 0.97 | 1.32 | 1.12 | 0.97 | 0.85 |
| black tea   | 5.44     | 4.40 | 3.39 | 3.93  | 2.93 | 2.67 | 3.93 | 2.77 | 2.23 | 3.32  | 2.72 | 2.30 | 1.99 | 2.72 | 2.30 | 1.99 | 1.76 |
| black tea   | 7.33     | 5.92 | 4.56 | 5.29  | 3.94 | 3.59 | 5.29 | 3.72 | 3.00 | 4.47  | 3.65 | 3.09 | 2.68 | 3.65 | 3.09 | 2.68 | 2.36 |
| black tea   | 1.90     | 1.54 | 1.18 | 1.37  | 1.02 | 0.93 | 1.37 | 0.97 | 0.78 | 1.16  | 0.95 | 0.80 | 0.70 | 0.95 | 0.80 | 0.70 | 0.61 |
| black tea   | 2.23     | 1.80 | 1.39 | 1.61  | 1.20 | 1.09 | 1.61 | 1.13 | 0.91 | 1.36  | 1.11 | 0.94 | 0.82 | 1.11 | 0.94 | 0.82 | 0.72 |
| black tea   | 1.94     | 1.57 | 1.21 | 1.40  | 1.04 | 0.95 | 1.40 | 0.98 | 0.79 | 1.18  | 0.97 | 0.82 | 0.71 | 0.97 | 0.82 | 0.71 | 0.63 |
| black tea   | 2.82     | 2.28 | 1.75 | 2.04  | 1.52 | 1.38 | 2.04 | 1.43 | 1.15 | 1.72  | 1.41 | 1.19 | 1.03 | 1.41 | 1.19 | 1.03 | 0.91 |
| black tea   | 1.36     | 1.10 | 0.85 | 0.98  | 0.73 | 0.67 | 0.98 | 0.69 | 0.56 | 0.83  | 0.68 | 0.58 | 0.50 | 0.68 | 0.58 | 0.50 | 0.44 |
| green tea   | 5.95     | 4.81 | 3.70 | 4.29  | 3.20 | 2.91 | 4.29 | 3.02 | 2.43 | 3.62  | 2.97 | 2.51 | 2.17 | 2.97 | 2.51 | 2.17 | 1.92 |
| green tea   | 4.91     | 3.97 | 3.06 | 3.54  | 2.64 | 2.41 | 3.54 | 2.49 | 2.01 | 2.99  | 2.45 | 2.07 | 1.80 | 2.45 | 2.07 | 1.80 | 1.58 |
| green tea   | 2.49     | 2.02 | 1.55 | 1.80  | 1.34 | 1.22 | 1.80 | 1.27 | 1.02 | 1.52  | 1.24 | 1.05 | 0.91 | 1.24 | 1.05 | 0.91 | 0.80 |
| green tea   | 1.01     | 0.82 | 0.63 | 0.73  | 0.54 | 0.50 | 0.73 | 0.51 | 0.41 | 0.62  | 0.50 | 0.43 | 0.37 | 0.50 | 0.43 | 0.37 | 0.33 |
| green tea   | 1.06     | 0.85 | 0.66 | 0.76  | 0.57 | 0.52 | 0.76 | 0.54 | 0.43 | 0.64  | 0.53 | 0.45 | 0.39 | 0.53 | 0.45 | 0.39 | 0.34 |
| white tea   | 2.74     | 2.22 | 1.71 | 1.98  | 1.48 | 1.34 | 1.98 | 1.39 | 1.12 | 1.67  | 1.37 | 1.16 | 1.00 | 1.37 | 1.16 | 1.00 | 0.89 |
| white tea   | 2.87     | 2.32 | 1.78 | 2.07  | 1.54 | 1.40 | 2.07 | 1.46 | 1.17 | 1.75  | 1.43 | 1.21 | 1.05 | 1.43 | 1.21 | 1.05 | 0.93 |
| white tea   | 1.36     | 1.10 | 0.85 | 0.98  | 0.73 | 0.67 | 0.98 | 0.69 | 0.56 | 0.83  | 0.68 | 0.58 | 0.50 | 0.68 | 0.58 | 0.50 | 0.44 |
| earl grey   | 4.95     | 4.00 | 3.08 | 3.57  | 2.66 | 2.42 | 3.57 | 2.51 | 2.02 | 3.01  | 2.47 | 2.09 | 1.81 | 2.47 | 2.09 | 1.81 | 1.60 |
| earl grey   | 2.78     | 2.25 | 1.73 | 2.01  | 1.50 | 1.36 | 2.01 | 1.41 | 1.14 | 1.70  | 1.39 | 1.17 | 1.02 | 1.39 | 1.17 | 1.02 | 0.90 |
| earl grey   | 0.87     | 0.71 | 0.54 | 0.63  | 0.47 | 0.43 | 0.63 | 0.44 | 0.36 | 0.53  | 0.44 | 0.37 | 0.32 | 0.44 | 0.37 | 0.32 | 0.28 |
| pu-erh      | 3.20     | 2.59 | 1.99 | 2.31  | 1.72 | 1.57 | 2.31 | 1.63 | 1.31 | 1.95  | 1.60 | 1.35 | 1.17 | 1.60 | 1.35 | 1.17 | 1.03 |
| pu-erh      | 2.64     | 2.13 | 1.64 | 1.90  | 1.42 | 1.29 | 1.90 | 1.34 | 1.08 | 1.61  | 1.31 | 1.11 | 0.96 | 1.31 | 1.11 | 0.96 | 0.85 |
| pu-erh      | 1.44     | 1.17 | 0.90 | 1.04  | 0.78 | 0.71 | 1.04 | 0.73 | 0.59 | 0.88  | 0.72 | 0.61 | 0.53 | 0.72 | 0.61 | 0.53 | 0.47 |

\* DI - average daily intake rate of tea.

**Table S9.** THQ parameter determined based on the results of the work of Szmagara et al. [1] obtained under the following brewing conditions: average daily intake rate of tea for age groups above 12 years is 1 L, tea [g]: water [mL] ratio: 2:100; time of brewing: 15 min.

|             | Children |      |      | Girls |      |      | Boys |      |      | Women |      |      | Men  |      |      |
|-------------|----------|------|------|-------|------|------|------|------|------|-------|------|------|------|------|------|
| DI* (L/day) | 0.44     | 0.56 | 0.61 | 1     | 1    | 1    | 1    | 1    | 1    | 1     | 1    | 1    | 1    | 1    | 1    |
| black tea   | 4.96     | 4.01 | 3.09 | 3.58  | 2.67 | 2.43 | 3.58 | 2.52 | 2.03 | 3.03  | 2.48 | 2.09 | 1.82 | 2.48 | 2.09 |
| black tea   | 3.09     | 2.50 | 1.92 | 2.23  | 1.66 | 1.51 | 2.23 | 1.57 | 1.26 | 1.88  | 1.54 | 1.30 | 1.13 | 1.54 | 1.30 |
| black tea   | 2.97     | 2.40 | 1.85 | 2.14  | 1.60 | 1.45 | 2.14 | 1.51 | 1.21 | 1.81  | 1.48 | 1.25 | 1.09 | 1.48 | 1.25 |
| black tea   | 7.41     | 5.99 | 4.61 | 5.35  | 3.99 | 3.63 | 5.35 | 3.76 | 3.03 | 4.52  | 3.70 | 3.13 | 2.71 | 3.70 | 3.13 |
| black tea   | 8.21     | 6.64 | 5.11 | 5.93  | 4.42 | 4.02 | 5.93 | 4.17 | 3.36 | 5.01  | 4.10 | 3.47 | 3.00 | 4.10 | 3.47 |
| black tea   | 2.56     | 2.07 | 1.59 | 1.85  | 1.38 | 1.25 | 1.85 | 1.30 | 1.05 | 1.56  | 1.28 | 1.08 | 0.94 | 1.28 | 1.08 |
| black tea   | 2.54     | 2.05 | 1.58 | 1.83  | 1.36 | 1.24 | 1.83 | 1.29 | 1.04 | 1.55  | 1.27 | 1.07 | 0.93 | 1.27 | 1.07 |
| black tea   | 2.30     | 1.86 | 1.43 | 1.66  | 1.24 | 1.13 | 1.66 | 1.17 | 0.94 | 1.40  | 1.15 | 0.97 | 0.84 | 1.15 | 0.97 |
| black tea   | 3.58     | 2.90 | 2.23 | 2.59  | 1.93 | 1.75 | 2.59 | 1.82 | 1.47 | 2.18  | 1.79 | 1.51 | 1.31 | 1.79 | 1.51 |
| black tea   | 1.67     | 1.35 | 1.04 | 1.21  | 0.90 | 0.82 | 1.21 | 0.85 | 0.68 | 1.02  | 0.83 | 0.71 | 0.61 | 0.83 | 0.71 |
| green tea   | 5.96     | 4.82 | 3.71 | 4.31  | 3.21 | 2.92 | 4.31 | 3.03 | 2.44 | 3.64  | 2.97 | 2.52 | 2.18 | 2.97 | 2.52 |
| green tea   | 5.46     | 4.42 | 3.40 | 3.94  | 2.94 | 2.68 | 3.94 | 2.77 | 2.24 | 3.33  | 2.72 | 2.30 | 2.00 | 2.72 | 2.30 |
| green tea   | 2.90     | 2.34 | 1.80 | 2.09  | 1.56 | 1.42 | 2.09 | 1.47 | 1.19 | 1.77  | 1.44 | 1.22 | 1.06 | 1.44 | 1.22 |
| green tea   | 1.21     | 0.98 | 0.75 | 0.87  | 0.65 | 0.59 | 0.87 | 0.62 | 0.50 | 0.74  | 0.60 | 0.51 | 0.44 | 0.60 | 0.51 |
| green tea   | 1.15     | 0.93 | 0.71 | 0.83  | 0.62 | 0.56 | 0.83 | 0.58 | 0.47 | 0.70  | 0.57 | 0.48 | 0.42 | 0.57 | 0.48 |
| white tea   | 3.01     | 2.43 | 1.87 | 2.17  | 1.62 | 1.47 | 2.17 | 1.53 | 1.23 | 1.83  | 1.50 | 1.27 | 1.10 | 1.50 | 1.27 |
| white tea   | 3.03     | 2.45 | 1.88 | 2.19  | 1.63 | 1.48 | 2.19 | 1.54 | 1.24 | 1.85  | 1.51 | 1.28 | 1.11 | 1.51 | 1.28 |
| white tea   | 1.44     | 1.17 | 0.90 | 1.04  | 0.78 | 0.71 | 1.04 | 0.73 | 0.59 | 0.88  | 0.72 | 0.61 | 0.53 | 0.72 | 0.61 |
| earl grey   | 5.74     | 4.64 | 3.57 | 4.14  | 3.09 | 2.81 | 4.14 | 2.91 | 2.35 | 3.50  | 2.86 | 2.42 | 2.10 | 2.86 | 2.42 |
| earl grey   | 3.56     | 2.88 | 2.22 | 2.57  | 1.92 | 1.74 | 2.57 | 1.81 | 1.46 | 2.17  | 1.78 | 1.50 | 1.30 | 1.78 | 1.50 |
| earl grey   | 0.99     | 0.80 | 0.62 | 0.72  | 0.53 | 0.49 | 0.72 | 0.50 | 0.41 | 0.61  | 0.50 | 0.42 | 0.36 | 0.50 | 0.42 |
| pu-erh      | 3.25     | 2.63 | 2.02 | 2.34  | 1.75 | 1.59 | 2.34 | 1.65 | 1.33 | 1.98  | 1.62 | 1.37 | 1.19 | 1.62 | 1.37 |
| pu-erh      | 2.86     | 2.31 | 1.78 | 2.06  | 1.54 | 1.40 | 2.06 | 1.45 | 1.17 | 1.74  | 1.42 | 1.21 | 1.04 | 1.42 | 1.21 |
| pu-erh      | 1.66     | 1.34 | 1.03 | 1.20  | 0.89 | 0.81 | 1.20 | 0.84 | 0.68 | 1.01  | 0.83 | 0.70 | 0.61 | 0.83 | 0.70 |

\* DI - average daily intake rate of tea.

## References

1. Szmagara, A.; Krzyszczyk, A.; Stefaniak, E.A. Determination of Fluoride Content in Teas and Herbal Products Popular in Poland. *J. Environ. Heal. Sci. Eng.* **2022**, *20*, 717–727, doi:10.1007/s40201-022-00811-4.
